# Supplementary material
Source: publisher figshare collection journal article supplement (https://gsapubs.figshare.com/ndownloader/files/23300858)
Supplement: Supplementary file 1 [file 23300858]

# Brushlines in fault pseudotachyites: A new criterion for coseismic slip direction

Ferré et al.

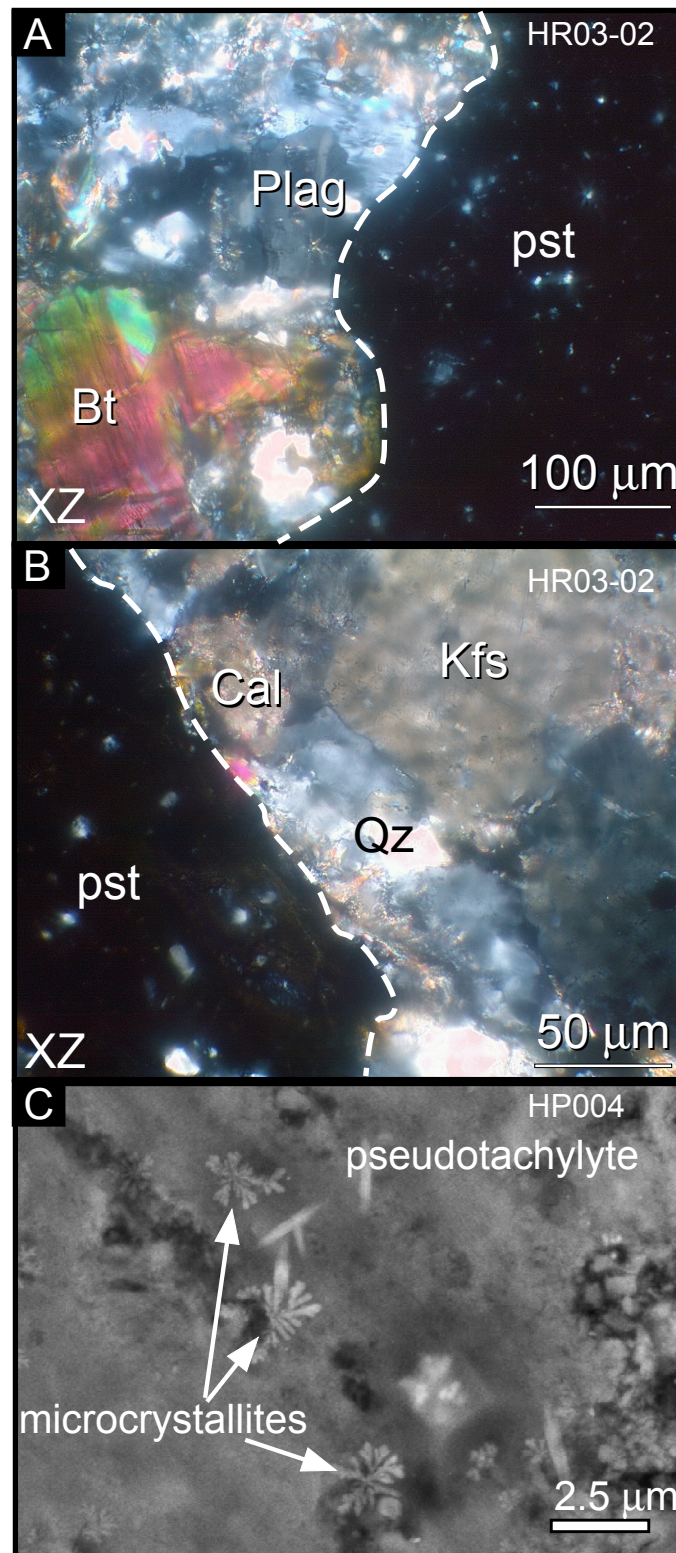

Figure DR1. A: The microstructures in the gneiss do not display any change towards the contact (XPL). Plagioclase does not show mechanical twins. B: Contact between pseudotachyite generation vein and mylonitic gneiss host-rock. The microstructures in the gneiss do not display any change towards the contact (XPL). Calcite and feldspar do not show mechanical twins. C: Back-scattered electron microscopy image of a representative sample of Hoping River pseudotachyites. The plagioclase snow flake-shaped microcrystallites attest of frictional melt rapid quenching.
